# Supplementary material for: The Phosphoarginine Phosphatase PtpB from Staphylococcus aureus Is Involved in Bacterial Stress Adaptation during Infection
Source: PubMed Central journal article supplement (PMC8001253; doi:10.3390/cells10030645), 2021-03-14
Supplement: cells-10-00645-s001.pdf [file cells-10-00645-s001.pdf]

# Supplementary Material

## The phosphoarginine phosphatase PtpB from *Staphylococcus aureus* is involved in bacterial stress adaptation during infection

Mohamed Ibrahim Elhawry <sup>1,3</sup>, Sylvaine Huc-Brandt <sup>2</sup>, Linda Pätzold <sup>1</sup>, Laila Gannoun-Zaki <sup>2</sup>, Ahmed Mostafa M. Abdrabou <sup>1,4</sup>, Markus Bischoff <sup>1,\*</sup>, and Virginie Molle <sup>2,\*</sup>

<sup>1</sup> Institute of Medical Microbiology and Hygiene, University of Saarland, Homburg/Saar, Germany

<sup>2</sup> Laboratory of Pathogen Host Interactions, Université de Montpellier, CNRS, UMR 5235, Montpellier, France

<sup>3</sup> Department of Pathology, Faculty of Veterinary Medicine, Zagazig University, Zagazig, Egypt.

<sup>4</sup> Medical Microbiology and Immunology Department, Faculty of Medicine, Mansoura University, Mansoura, Egypt.

\* Correspondence: V.M. virginie.molle@umontpellier.fr; Tel.: +33 467144725; M.B. markus.bischoff@uks.eu, +49 6841 1623963

Supplementary Table 1: Primers used in this study.

| Primer                   | Direction | Sequence (5'-3') <sup>1</sup>                   |
|--------------------------|-----------|-------------------------------------------------|
| <b>Cloning primer</b>    |           |                                                 |
| MBH510                   | For.      | gtcggT <u>ACCAACTGAAACAGTTT</u> TATGGAC         |
| MBH511                   | Rev.      | gtgctcgagACGAATAAAATCTTCATAGTTCACATCC           |
| MBH512                   | For.      | GATATTATTGCTAGTAGGA <u>ATTCTG</u>               |
| MBH513                   | Rev.      | gtcgcgCTCCATATTCAACGAAATTGTAG                   |
| VM11_PtpA_pRMC2          | For.      | tatGGT <u>ACCGGGATATAACTACATAGT</u>             |
| VM11(1)_PtpA-spot-Ct_Gib | Rev.      | CACGAACACGATCTGGCCCTTCTTTCAAATTTGC              |
| VM11(2)_PtpA-spot-Ct_Gib | For.      | GCAAATTTGAAAGAAGGGCCAGATCGTGTTCTGTG             |
| VM26_PtpB_pRMC2          | For.      | TAAGCTT <u>GATGGTACATTATTA</u> AAGGATGTGAACT    |
| VM27_PtpB-spot-Ct_Gib    | Rev.      | ACGATCTGGTGACCCGCAAATAATATCTTTTAATT             |
| VM28_PtpB-Spot-Ct_Gib    | For.      | AAAGATATTATTGCGGGTCACCAGATCGTGTTCCG             |
| VM29_Spot-Ct_pRMC2       | Rev.      | GACGGCCAGTGA <u>ATTCTA</u> AAGAACTCCAATGTGATA   |
| VM49_SecA_pRMC2          | For.      | TAAGCTT <u>GATGGTACAACAGTTTTT</u> TAGCTAAAGGAGC |
| VM50_SecA-spot-Ct_Gib    | Rev.      | ACGATCTGGTGACCCCTTTCCATGGCAATTTTTGAAT           |
| VM51_SecA-spot-Ct_Gib    | For.      | AATTG <u>CCATGGAAAAGGGT</u> CACCAGATCGTGTTCC    |
| <b>qRT-PCR primer</b>    |           |                                                 |
| <i>ahpC</i>              | For.      | TCCAACCTGAATTAGAAGACT                           |
| <i>ahpC</i>              | Rev.      | GAGAATACATTTACGCCTAAT                           |
| <i>crtM</i>              | For.      | ACAGTAGGTGAAGTATTGAC                            |
| <i>crtM</i>              | Rev.      | ATCGTATGTCTGATGTGTTT                            |
| <i>gyrB</i>              | For.      | GACTGATGCCGATGTGGA                              |
| <i>gyrB</i>              | Rev.      | AACGGTGGCTGTGCAATA                              |
| <i>hla</i>               | For.      | AACCCGGTATATGGCAATCAACT                         |
| <i>hla</i>               | Rev.      | CTGCTGCTTTCATAGAGCCATT                          |
| <i>katA</i>              | For.      | AATGGACAATGTATATCAAGT                           |
| <i>katA</i>              | Rev.      | ATCAAATGGATTATCTTTATGGT                         |
| <i>sodA</i>              | For.      | ACCAAGATAATCCATTAAGTGA                          |
| <i>sodA</i>              | Rev.      | ATTTTAGGTAATAAGCGTGTTT                          |
| <i>sodM</i>              | For.      | CCAAGATAATCCATTAACAGAA                          |
| <i>sodM</i>              | Rev.      | CCAACATCAAATAGTAAGATTG                          |

<sup>1</sup> Small letters represent nucleotides that do not fit with the target sequence. Restriction sites used for cloning are underlined.

# Supplementary Figure 1

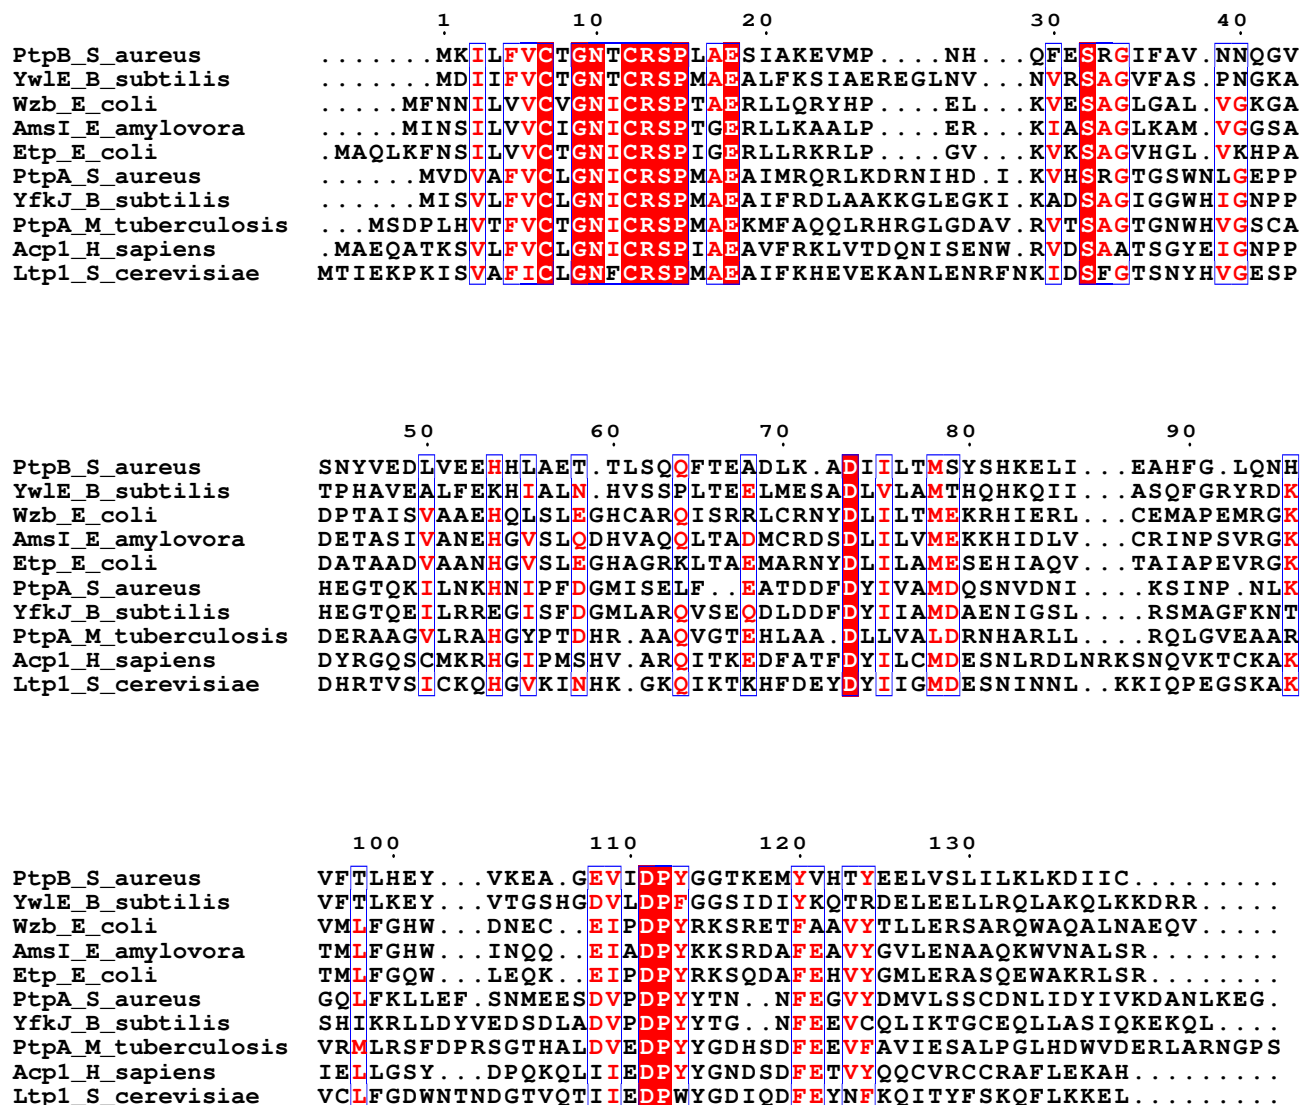

**Supplementary Figure 1: Alignment of LMW-PTPs.** Sequence alignment of LMW-PTPs from various species (the sequence names consist of the protein name followed by the source organism). Conserved residues are highlighted in red. The characters in red represent the conservative residues. This figure was created using the ESPript server (Robert & Gouet, 2014).
